# Supplementary material for: Theoretical design of imprinted albumin against foodborne toxins
Source: Royal Society of Chemistry journal article supplement (doi:10.1039/d3me00179b), 2024-01-01
Supplement: d3me00179b1.pdf [file d3me00179b1.pdf]

## **Theoretical Design of Imprinted Albumin against Foodborne Toxins**

Polina M. Ilicheva,<sup>\*a</sup> Elena S. Fedotova,<sup>a</sup> Kirill Y. Presnyakov,<sup>a</sup> Vyacheslav S. Grinev,<sup>a,b</sup> Pavel S. Pidenko<sup>a</sup> and Natalia A. Burmistrova<sup>a</sup>

<sup>a</sup> *Institute of Chemistry, Saratov State University, Astrakhanskaya Street 83, 410012 Saratov, Russia*

<sup>b</sup> *Institute of Biochemistry and Physiology of Plants and Microorganisms, Russian Academy of Sciences, Prospekt Entuziastov 13, 410049 Saratov, Russia*

\* Corresponding author.

*E-mail address: ilichevapm@gmail.com*

**Table S1.** Secondary structure ( $\alpha$ -helix content, %) of the BSA at different pH values

| <b>pH</b> | <b>Modelling</b> | <b>Method of Greenfield and Fasman</b> |
|-----------|------------------|----------------------------------------|
| 3.0       | 55.1             | 54.5                                   |
| 7.4       | 67.2             | 68.9                                   |

**Table S2.** Solvent accessible surface area (SASA) of the Trp residues of BSA at various pH values

| <b>Residue</b>   | <b>Trp134</b> |               | <b>Trp213</b> |               |
|------------------|---------------|---------------|---------------|---------------|
|                  | <b>pH 7.4</b> | <b>pH 3.0</b> | <b>pH 7.4</b> | <b>pH 3.0</b> |
| SASA (Non-polar) | 11.05         | 41.05         | 19.85         | 71.18         |
| SASA (Polar)     | 0             | 0             | 16.92         | 14.33         |
| SASA             | 11.05         | 41.05         | 36.75         | 85.51         |

**Table S3.** Free binding energy of BSA-template complexes at pH 3.0

| Template molecule | $\Delta G_{MM-GBSA}$ , kcal/mol                                                                                       | Complex BSA—template                                                                  |
|-------------------|-----------------------------------------------------------------------------------------------------------------------|---------------------------------------------------------------------------------------|
| ZEA               | 1: -33.8<br>2: -40.9<br>3: -47.8<br>4: -35.1<br>5: -25.7                                                              | 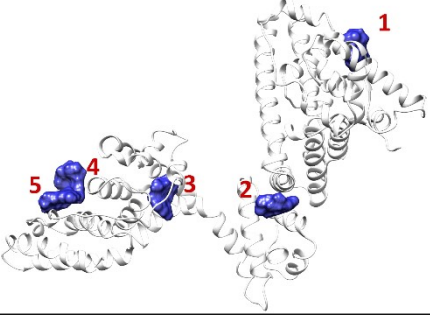   |
| ZEA (pH 7.4)      | 1: -40.3<br>2: -37.9<br>3: -28.6<br>4: -23.9<br>5: -23.5                                                              |    |
| DON               | 1: -49.8<br>2: -46.5<br>3: -39.0<br>4: -36.7<br>5: -33.8<br>6: -31.6<br>7: -23.3                                      |   |
| DOM-1             | 1: -50.5<br>2: -39.3<br>3: -36.0<br>4: -29.3<br>5: -21.7                                                              |  |
| AFB-1             | 1: -65.9<br>2: -56.3<br>3: -51.9<br>4: -43.2<br>5: -41.5<br>6: -41.4<br>7: -38.7<br>8: -34.7<br>9: -34.7<br>10: -26.5 |  |
| KWA               | 1: -59.8<br>2: -53.6<br>3: -40.8<br>4: -40.5<br>5: -37.6<br>6: -30.5<br>7: -23.6                                      |  |

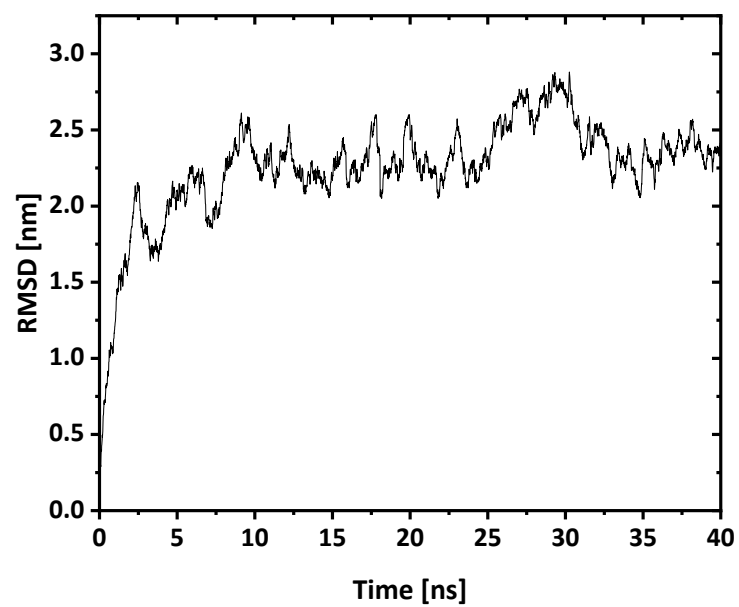

**Fig.S1.** RMSD of BSA during molecular dynamics simulation.

**A**

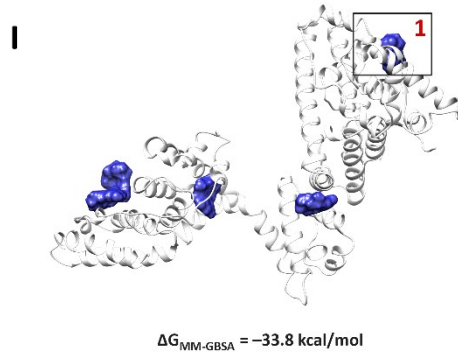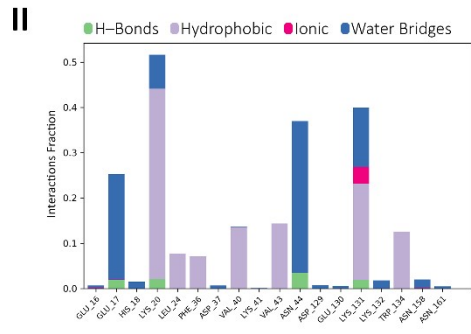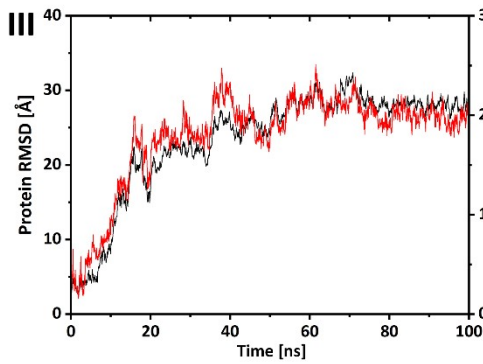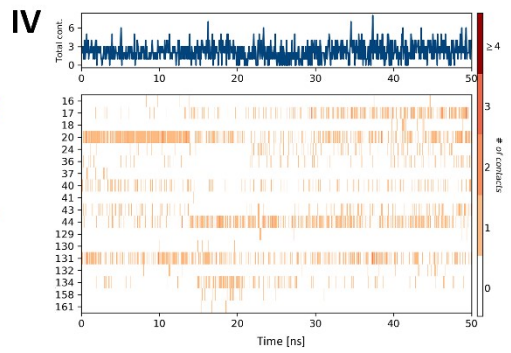

**B**

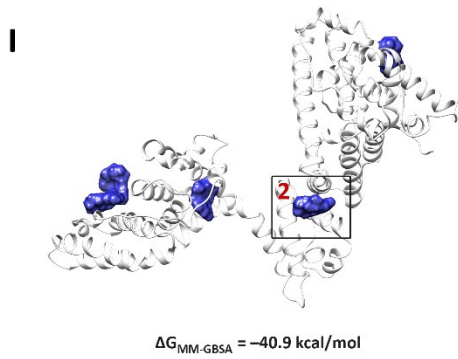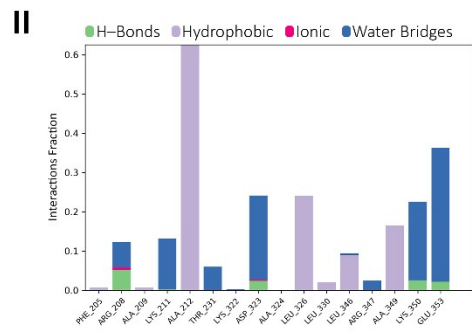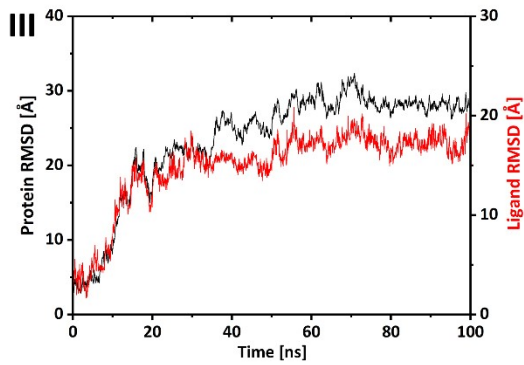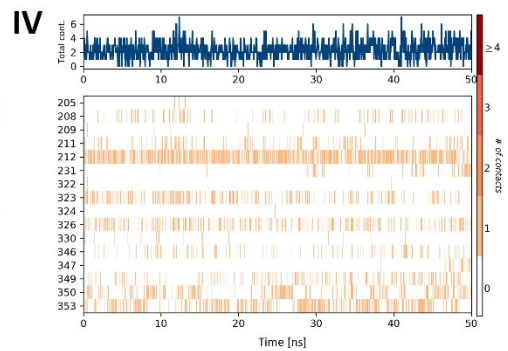

C

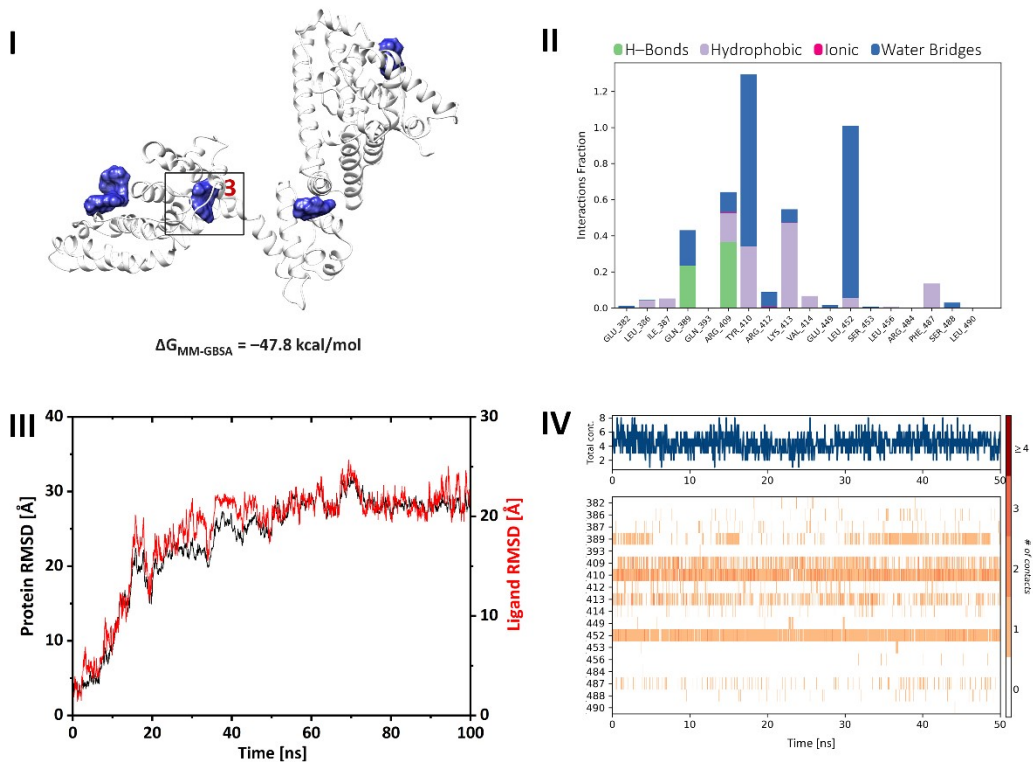

D

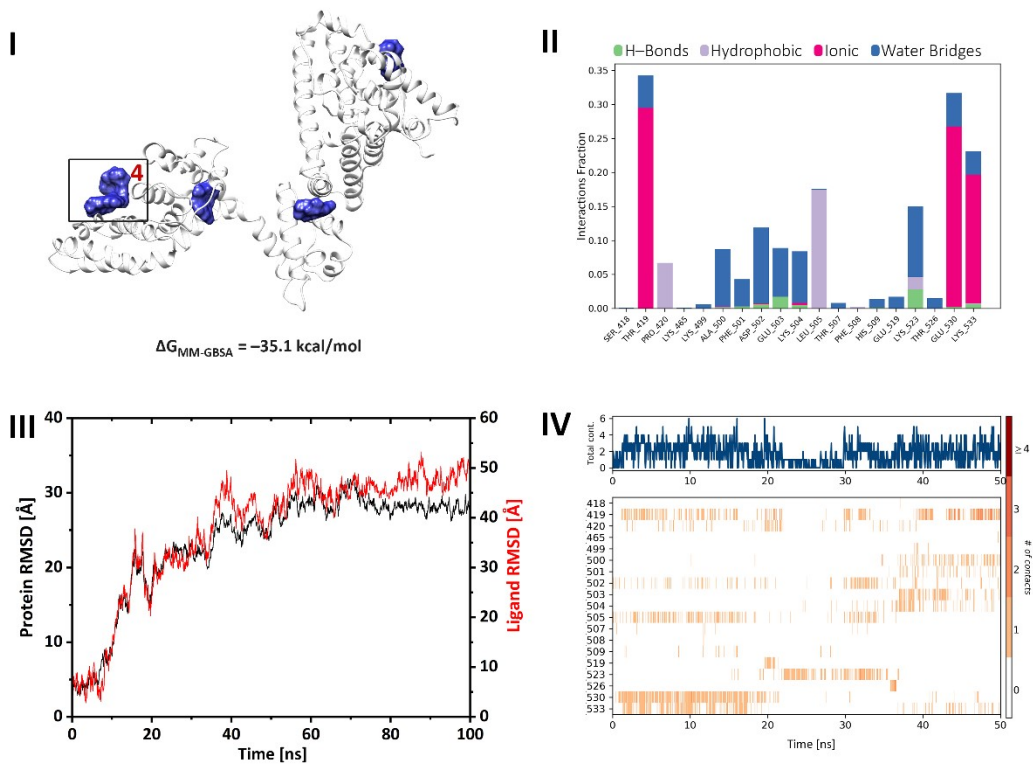

E

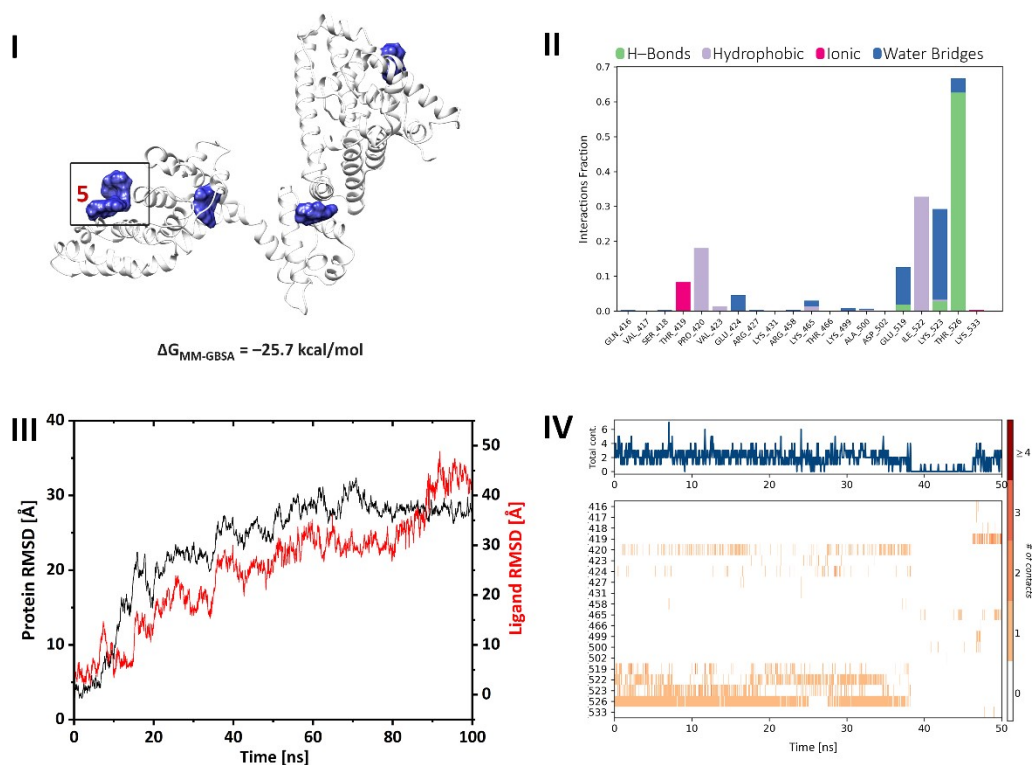

**Fig.S2.** Results of molecular modelling of BSA-ZEA complex at pH 3.0: (I) location of ZEA in the supposed binding site; (II) protein–ligand interactions percentage; (III) system RMSD; (IV) the intensity of contacts between the ligand and amino acids during simulation time.
